# Supplementary material for: Integrating PtNi nanoparticles on NiFe layered double hydroxide nanosheets as a bifunctional catalyst for hybrid sodium–air batteries
Source: Royal Society of Chemistry journal article supplement (doi:10.1039/d0ta04602g), 2020-01-01
Supplement: d0ta04602g1.pdf [file d0ta04602g1.pdf]

## Supplementary Material

### **Integrating PtNi Nanoparticles on NiFe Layered Double Hydroxide Nanosheets as Bifunctional Catalyst for Hybrid Sodium-Air Batteries**

Xueqing Yu,<sup>‡a</sup> Yao Kang,<sup>‡a</sup> Shuo Wang,<sup>‡a</sup> Kwan San Hui,<sup>b</sup> Kwun Nam Hui,<sup>\*a</sup> Huajun Zhao,<sup>ac</sup> Jianding Li,<sup>a</sup> Bo Li,<sup>a</sup> Jincheng Xu,<sup>a</sup> Liang Chen,<sup>\*de</sup> and Huaiyu Shao<sup>\*a</sup>

<sup>a</sup>Joint Key Laboratory of the Ministry of Education, Institute of Applied Physics and Materials Engineering, University of Macau, Avenida da Universidade, Taipa, Macau SAR, China. Email: [bizhui@um.edu.mo](mailto:bizhui@um.edu.mo), [hshao@um.edu.mo](mailto:hshao@um.edu.mo)

<sup>b</sup> Engineering, Faculty of Science, University of East Anglia, Norwich, NR4 7TJ, United Kingdom

<sup>c</sup> Department of Materials Science and Engineering, Southern University of Science and Technology, Shenzhen, Guangdong 518055, China

<sup>d</sup> Ningbo Institute of Materials Technology and Engineering, Chinese Academy of Sciences, Ningbo, Zhejiang 315201, China. Email: [chenliang@nimte.ac.cn](mailto:chenliang@nimte.ac.cn)

<sup>e</sup> University of Chinese Academy of Sciences, Beijing, 100049, China

<sup>‡</sup> These authors contributed equally.

<sup>\*</sup> Corresponding author.

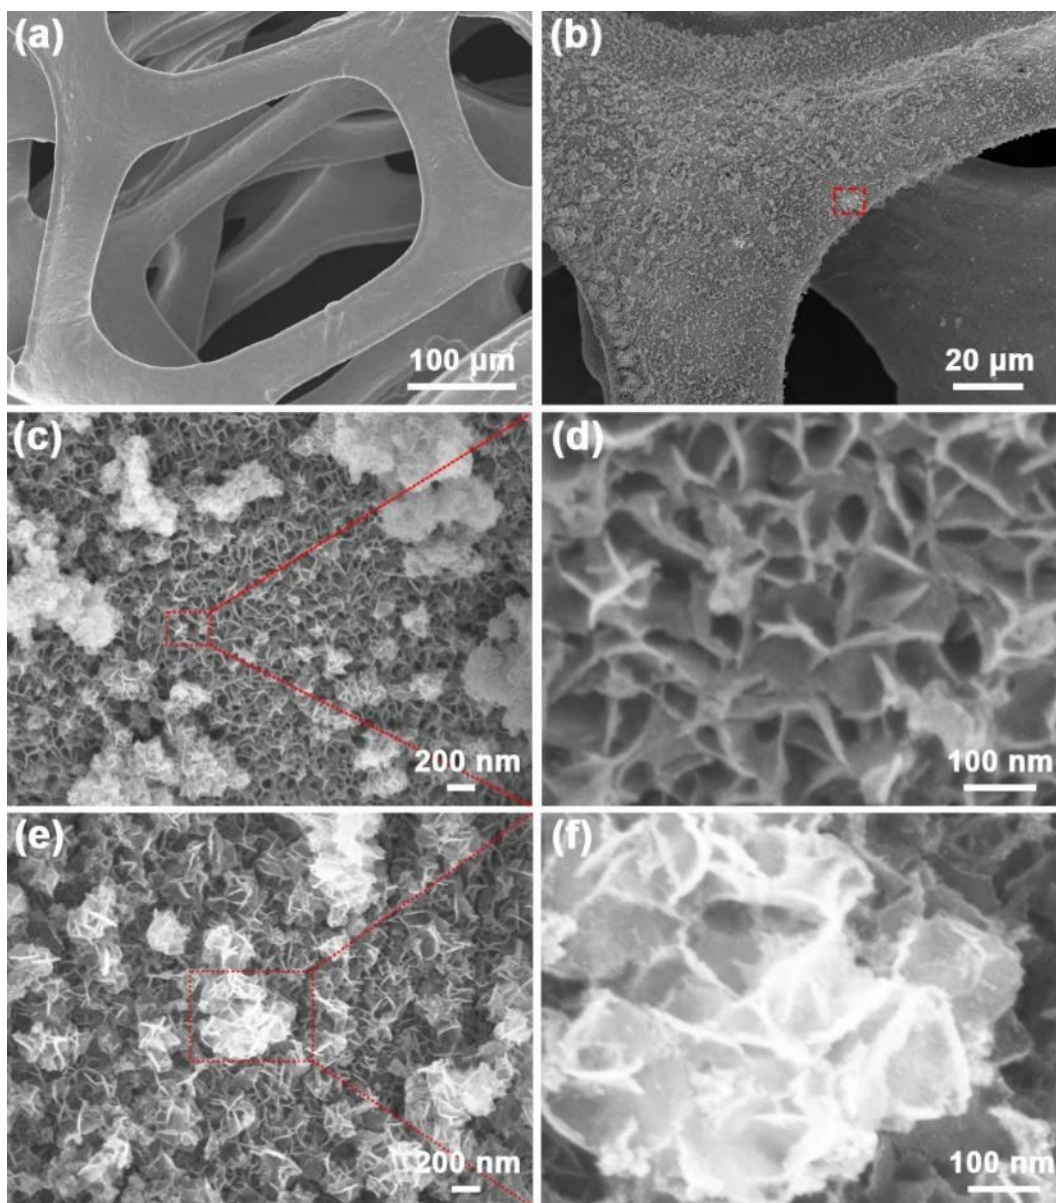

**Fig. S1** SEM images of (a) pristine Ni foam, (b-d) NiFe LDHs, and (e, f) NiZnFe LDHs.

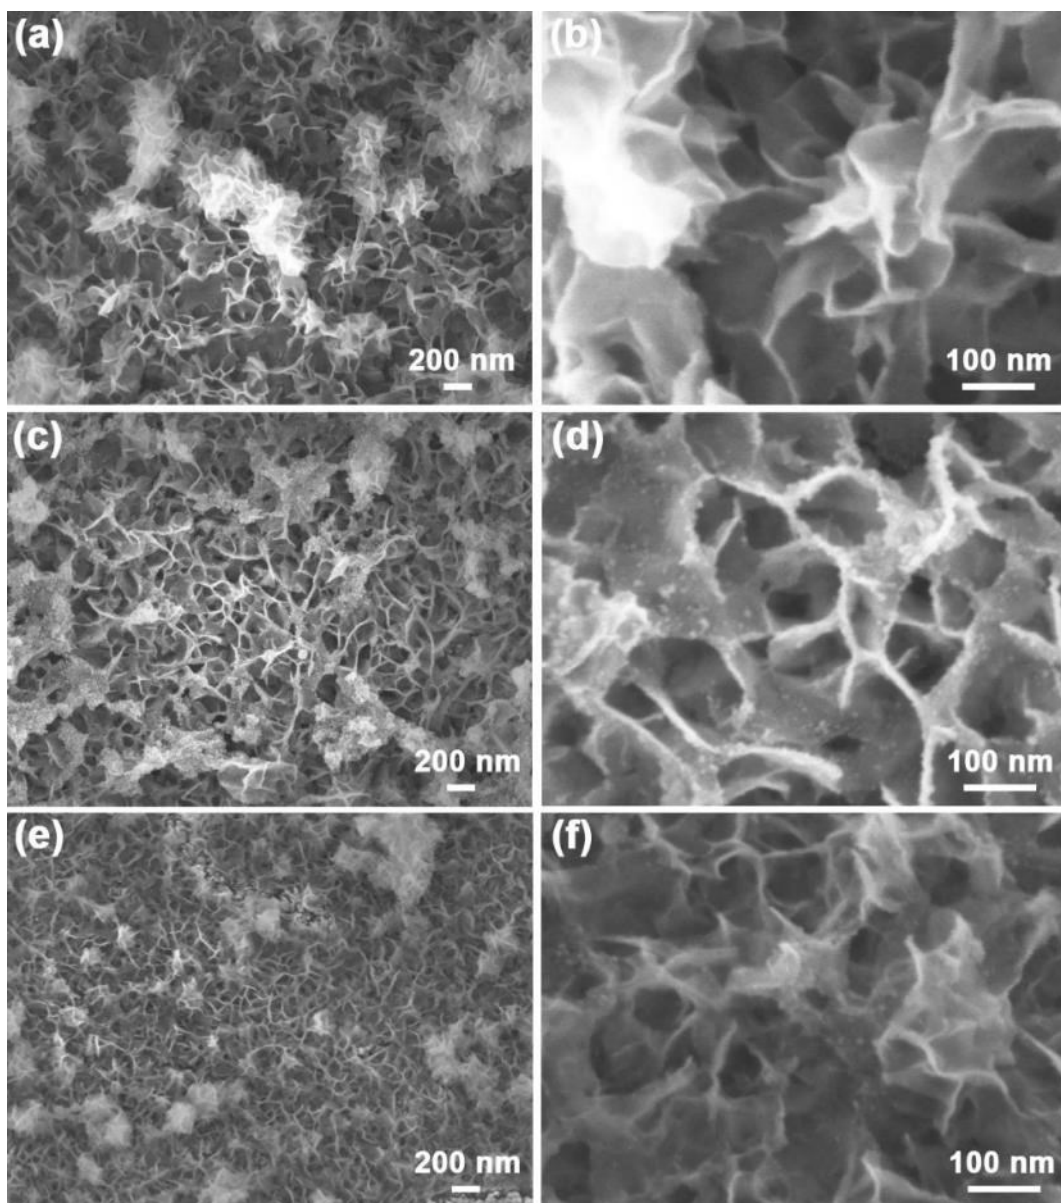

**Fig. S2** SEM images of (a, b)  $\text{Ni}_x\text{Fe}$  LDHs, (c, d) Pt/ $\text{Ni}_x\text{Fe}$  LDHs, and (e, f)  $\text{Pt}_3\text{Ni}_1/\text{Ni}_x\text{Fe}$  LDHs at different magnifications.

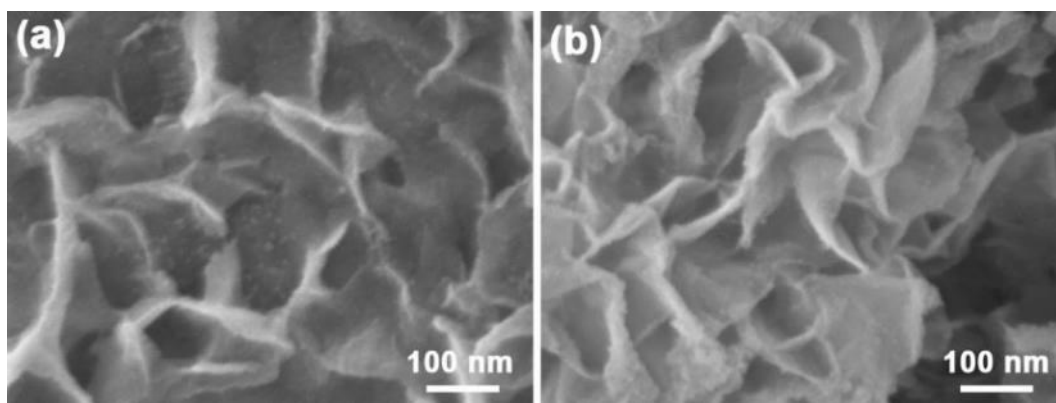

**Fig. S3** SEM images of (a)  $\text{Pt}_1\text{Ni}_1/\text{Ni}_x\text{Fe}$  LDHs and (b)  $\text{Pt}_1\text{Ni}_3/\text{Ni}_x\text{Fe}$  LDHs.

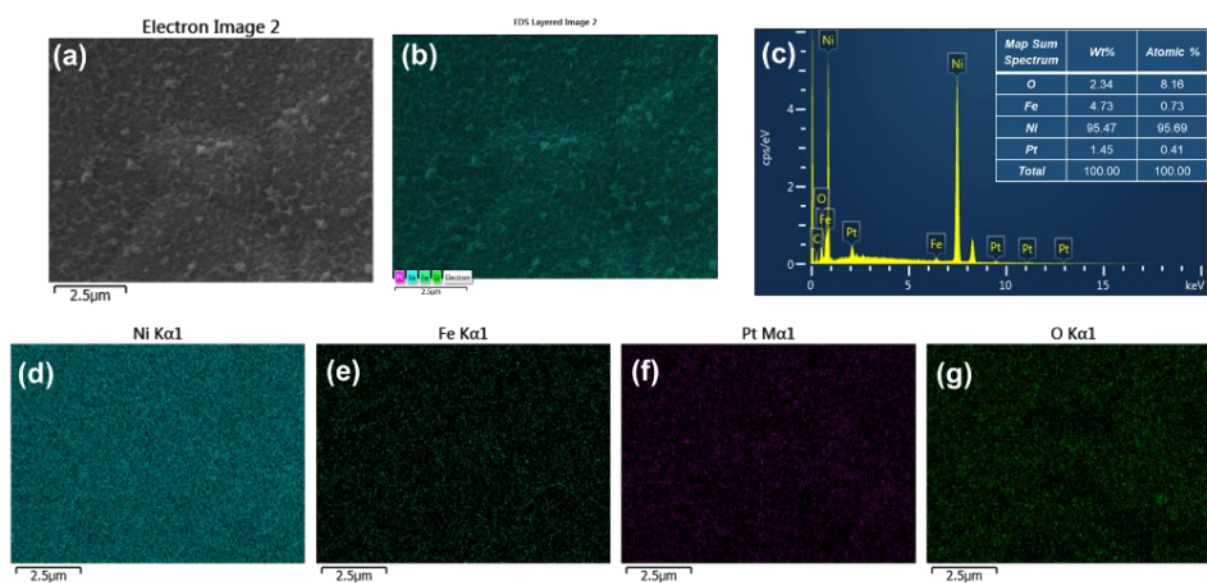

**Fig. S4** (a) SEM and (b-g) corresponding EDS elemental mapping images of  $\text{Pt}_3\text{Ni}_1/\text{Ni}_x\text{Fe}$  LDHs nanocomposites.

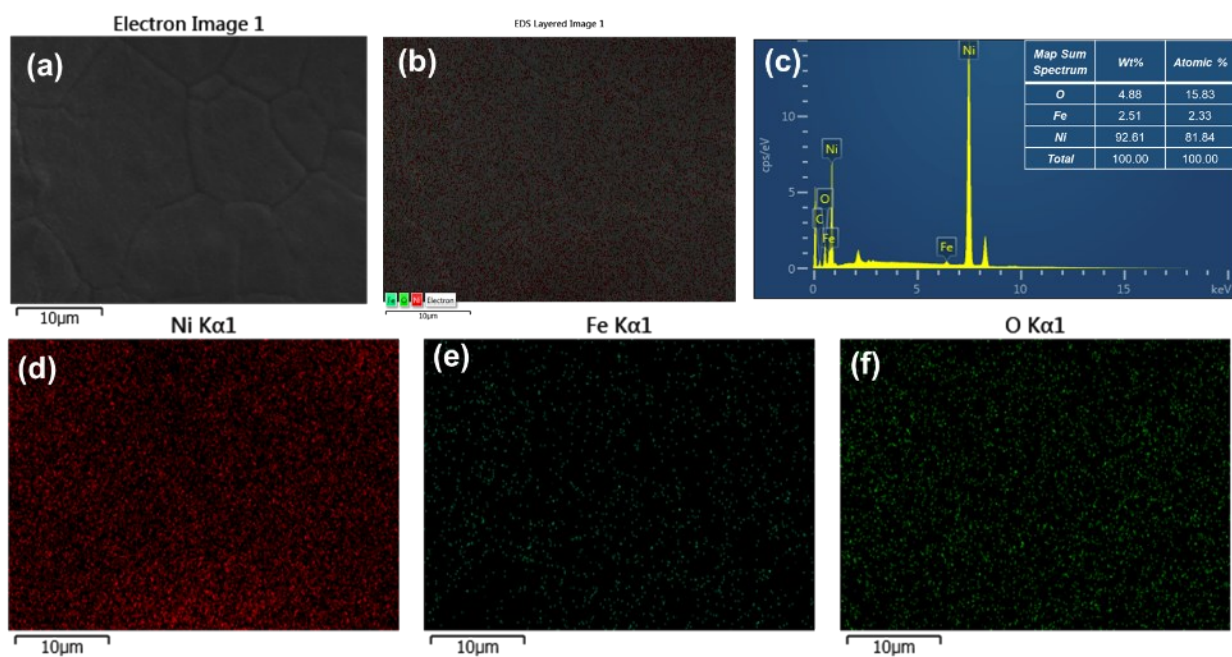

**Fig. S5** (a) SEM and (b-f) corresponding EDS elemental mapping images of  $\text{Ni}_x\text{Fe}$  LDHs nanocomposites.

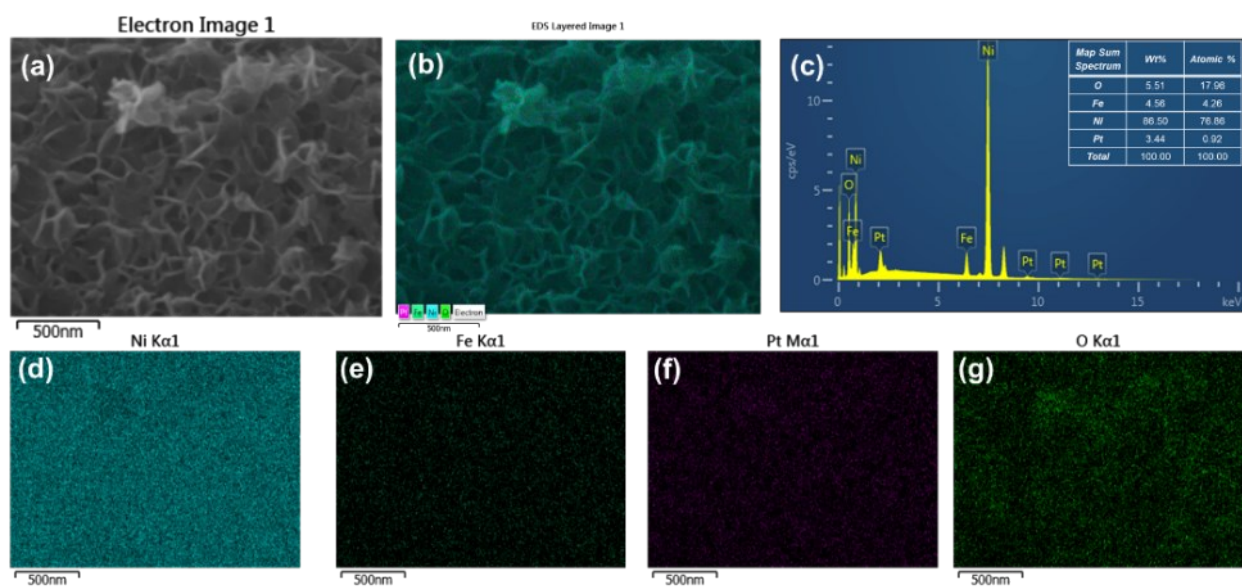

**Fig. S6** (a) SEM and (b-g) corresponding EDS elemental mapping images of  $\text{Pt}/\text{Ni}_x\text{Fe}$  LDHs nanocomposites.

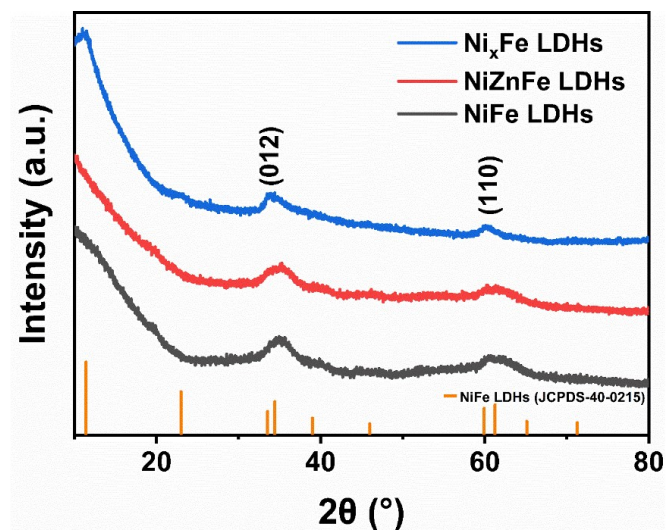

**Fig. S7** The XRD patterns of NiFe LDHs, NiZnFe LDHs, and Ni<sub>x</sub>Fe LDHs nanosheets.

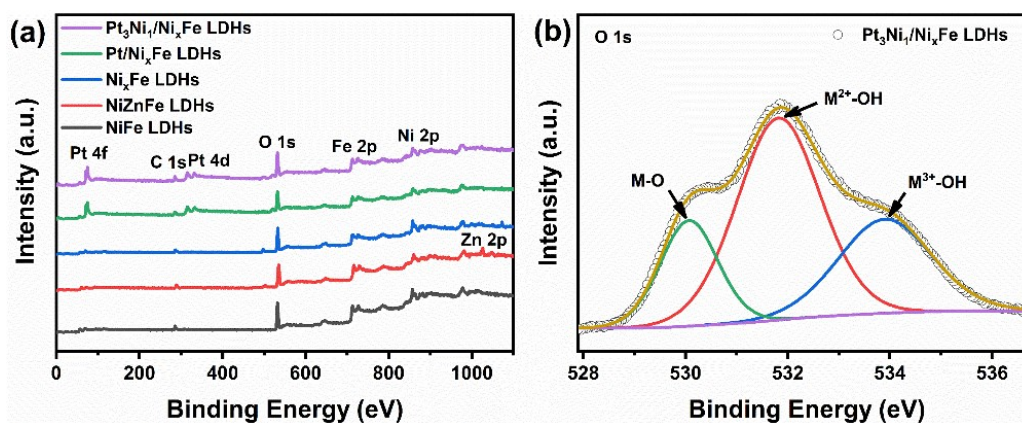

**Fig. S8** (a) The overall XPS spectra of NiFe LDHs, NiZnFe LDHs, Ni<sub>x</sub>Fe LDHs, Pt/Ni<sub>x</sub>Fe LDHs, and Pt<sub>3</sub>Ni<sub>1</sub>/Ni<sub>x</sub>Fe LDHs. (b) High-resolution XPS spectra of O 1s core levels in Pt<sub>3</sub>Ni<sub>1</sub>/Ni<sub>x</sub>Fe LDHs.

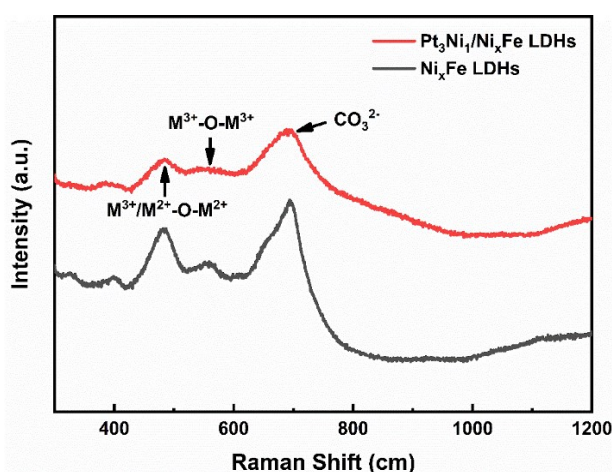

**Fig. S9** Raman spectra of NiFe LDHs and Pt<sub>3</sub>Ni<sub>1</sub>/Ni<sub>x</sub>Fe LDHs obtained at 633 nm.

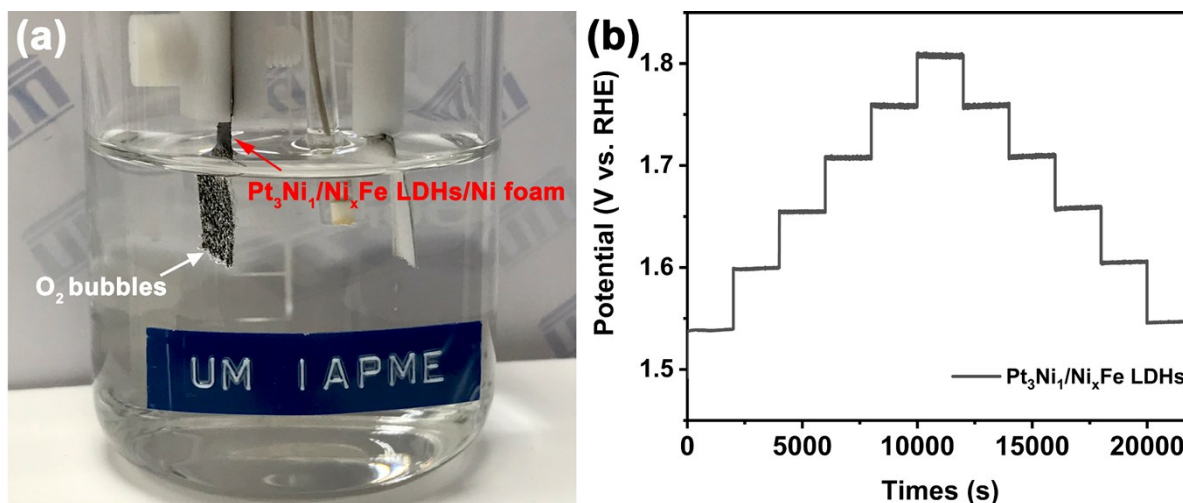

**Fig. S10** (a) Digital photo of Pt<sub>3</sub>Ni<sub>1</sub>/Ni<sub>x</sub>Fe LDHs for catalyzing OER process. (b) Multi-current process obtained with the Pt<sub>3</sub>Ni<sub>1</sub>/Ni<sub>x</sub>Fe LDHs electrode in 1 M KOH. The current density started at 50 mA cm<sup>-2</sup> increased to 250 mA cm<sup>-2</sup>, then down to 50 mA cm<sup>-2</sup>, with a gradient of 50 mA cm<sup>-2</sup> every 500 s.

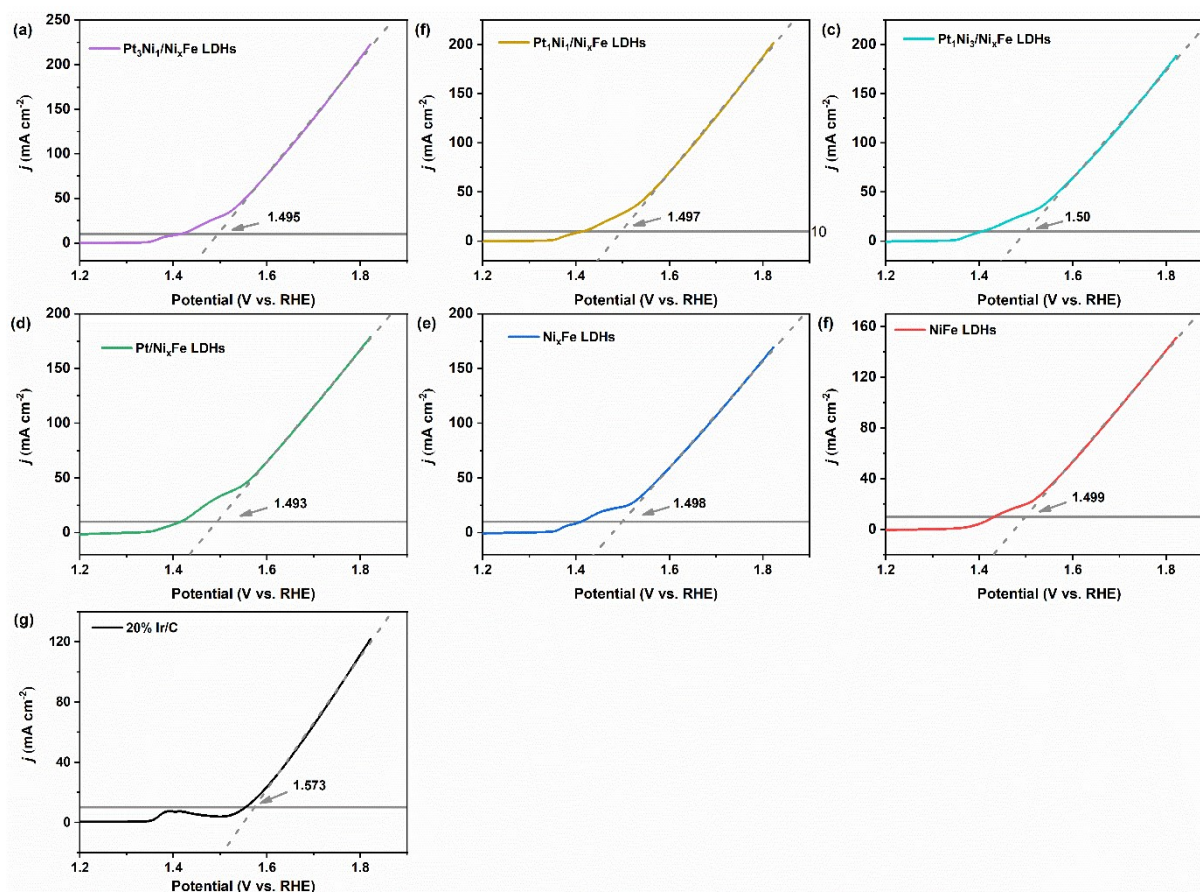

**Fig. S11** OER LSV curves of (a) Pt<sub>3</sub>Ni<sub>1</sub>/Ni<sub>x</sub>Fe LDHs, (b) Pt<sub>1</sub>Ni<sub>1</sub>/Ni<sub>x</sub>Fe LDHs, (c) Pt<sub>1</sub>Ni<sub>3</sub>/Ni<sub>x</sub>Fe LDHs, (d) Pt/Ni<sub>x</sub>Fe LDHs, (e) Ni<sub>x</sub>Fe LDHs, (f) NiFe LDHs and (g) commercial 20% Ir/C, and the corresponding applied voltages at 10 mA cm<sup>-2</sup> were estimated by extrapolating the polarization curves, respectively.

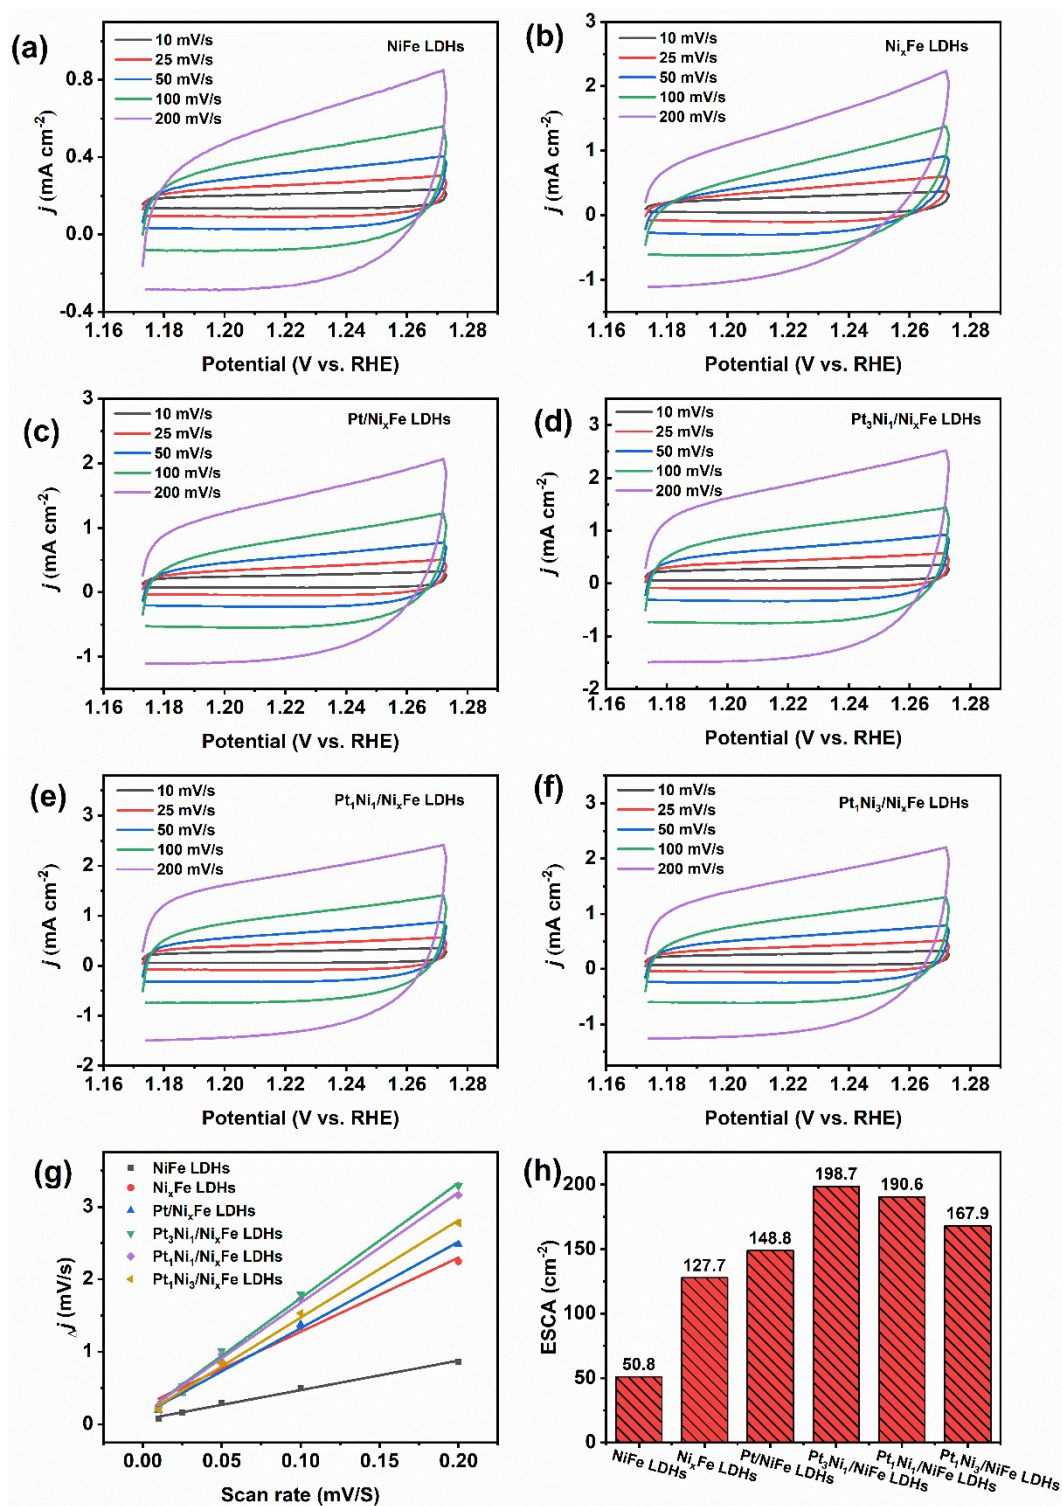

**Fig. S12** Cyclic voltammograms obtained with (a) NiFe LDHs, (b) Ni<sub>x</sub>Fe LDHs, (c) Pt/Ni<sub>x</sub>Fe LDHs, (d) Pt<sub>3</sub>Ni<sub>1</sub>/Ni<sub>x</sub>Fe LDHs, (e) Pt<sub>1</sub>Ni<sub>1</sub>/Ni<sub>x</sub>Fe LDHs, and (f) Pt<sub>1</sub>Ni<sub>3</sub>/Ni<sub>x</sub>Fe LDHs in the capacitance current range (1.173-1.273 V) at scan rates of 10, 25, 50, 100 and 200 mV s<sup>-1</sup>, respectively. (g) The plot of the difference between double layer charging currents ( $j_a - j_c$ ) vs. scan rate. (h) ESCA of various catalysts.



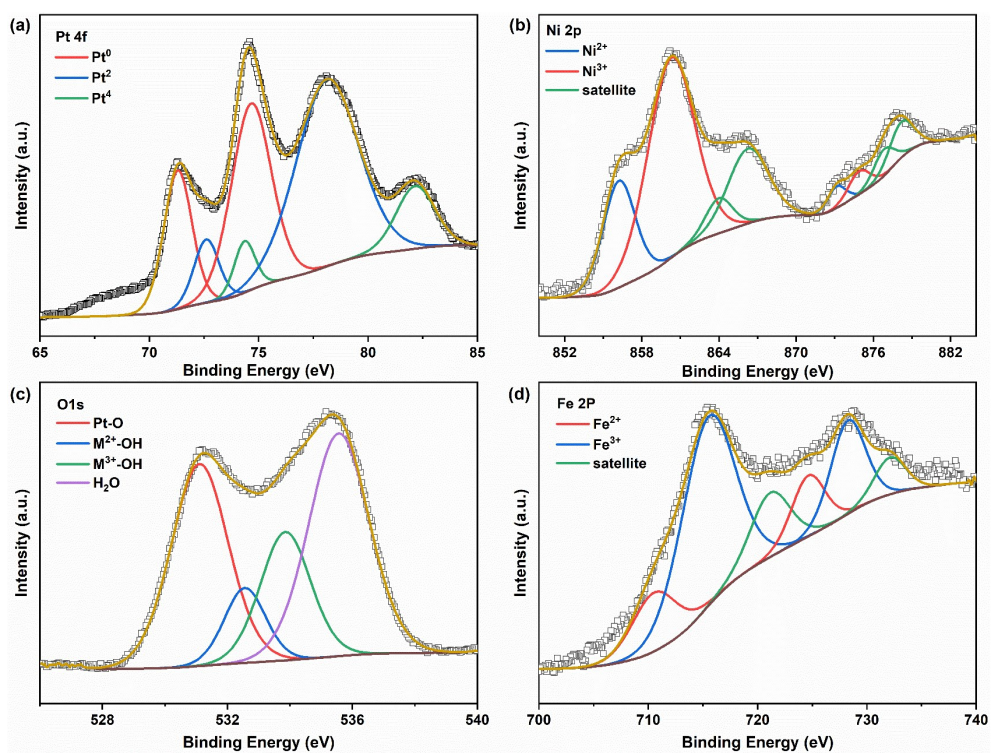

**Fig. S13** High-resolution XPS spectra of (a) Pt 4f, (b) Ni 2p, (c) O 1s and (d) Fe 2p for Pt<sub>3</sub>Ni<sub>1</sub>/NiFe LDHs after OER durability test.

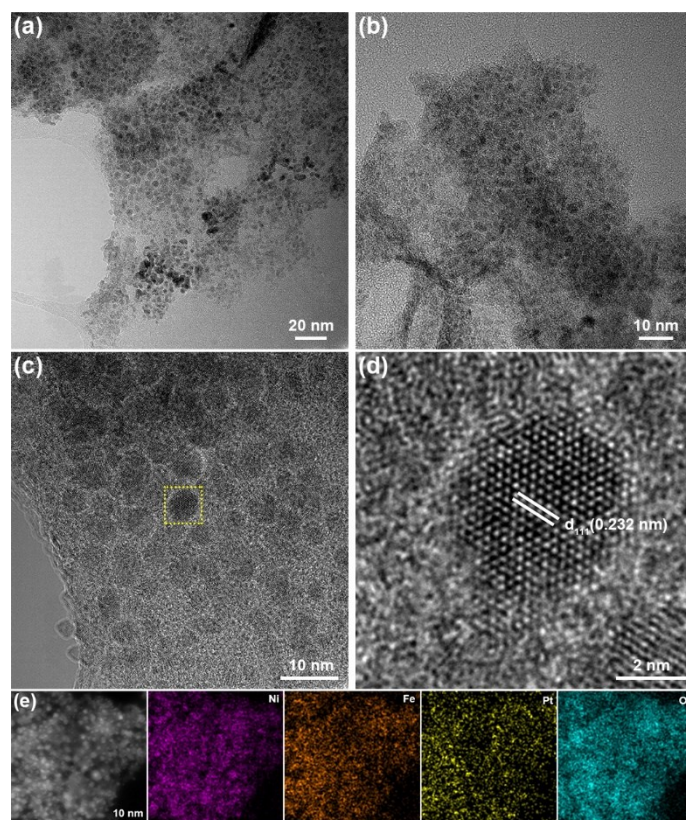

**Fig. S14** (a-c) TEM, (d) HRTEM and (e) the corresponding EDS element mapping images of Pt<sub>3</sub>Ni<sub>1</sub>/NiFe LDHs after OER durability test for 2000 CV cycles.

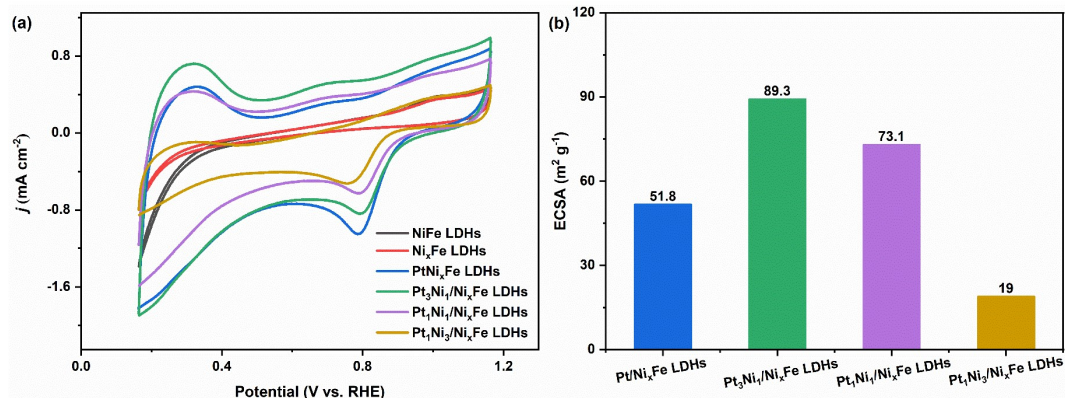

**Fig. S15** (a) ORR CV curves of Pt<sub>3</sub>Ni<sub>1</sub>/Ni<sub>x</sub>Fe LDHs, Pt<sub>1</sub>Ni<sub>1</sub>/Ni<sub>x</sub>Fe LDHs, Pt<sub>1</sub>Ni<sub>3</sub>/Ni<sub>x</sub>Fe LDHs, Pt/Ni<sub>x</sub>Fe LDHs, Ni<sub>x</sub>Fe LDHs and NiFe LDHs in O<sub>2</sub>-saturated 0.1M KOH solutions at a scan rate of 20 mV s<sup>-1</sup>. (b) Specific ECSAs for Pt<sub>3</sub>Ni<sub>1</sub>/Ni<sub>x</sub>Fe LDHs, Pt<sub>1</sub>Ni<sub>1</sub>/Ni<sub>x</sub>Fe LDHs, Pt<sub>1</sub>Ni<sub>3</sub>/Ni<sub>x</sub>Fe LDHs and Pt/Ni<sub>x</sub>Fe LDHs.

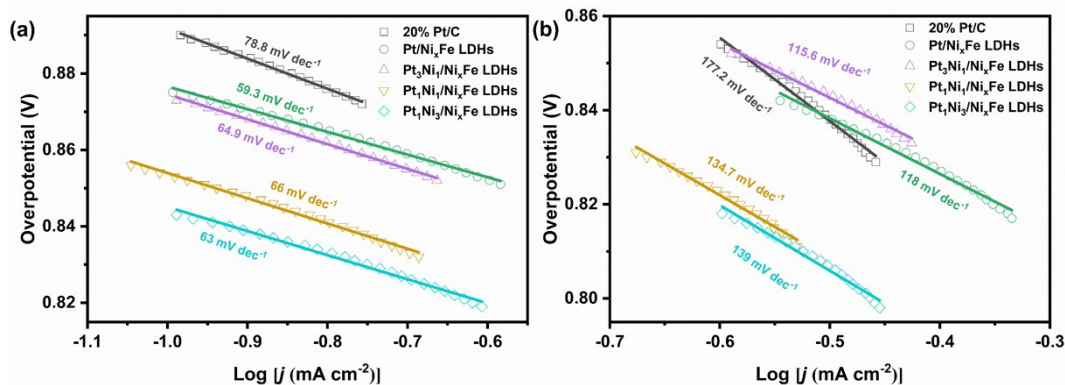

**Fig. S16** Tafel plots of Pt<sub>3</sub>Ni<sub>1</sub>/Ni<sub>x</sub>Fe LDHs, Pt<sub>1</sub>Ni<sub>1</sub>/Ni<sub>x</sub>Fe LDHs, Pt<sub>1</sub>Ni<sub>3</sub>/Ni<sub>x</sub>Fe LDHs, Pt/Ni<sub>x</sub>Fe LDHs and commercial Pt/C catalyst at (a) low overpotential and (b) high overpotential.

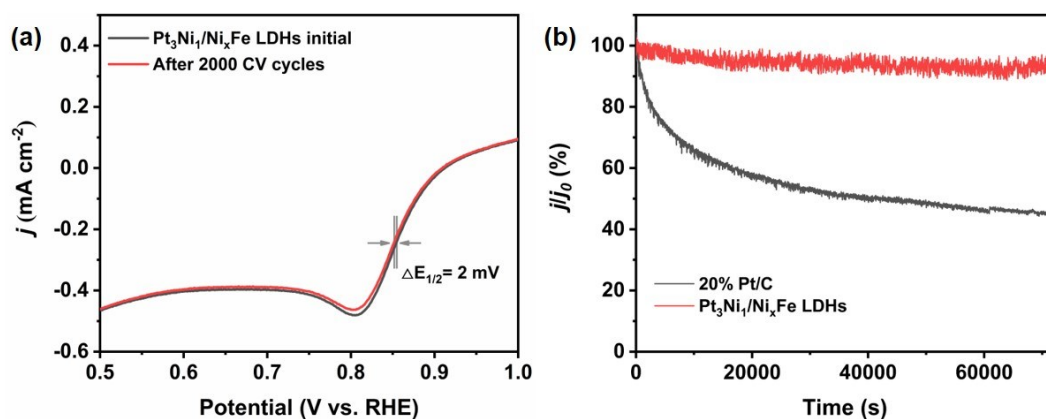

**Fig. S17** (a) ORR LSVs of Pt<sub>3</sub>Ni<sub>1</sub>/Ni<sub>x</sub>Fe LDHs before and after 2000 CV cycles. (b) ORR stability test at 0.68 V vs. RHE for 20 h.

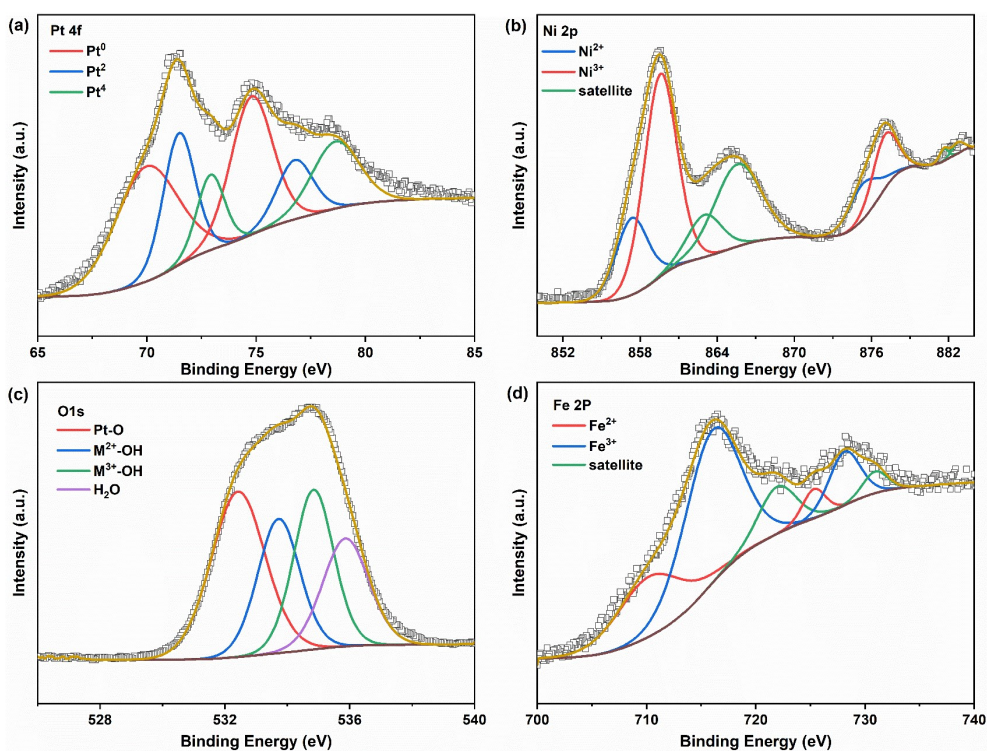

**Fig. S18** High-resolution XPS spectra of (a) Pt 4f, (b) Ni 2p, (c) O 1s and (d) Fe 2p for  $\text{Pt}_3\text{Ni}_1/\text{NiFe}$  LDHs after ORR durability test.

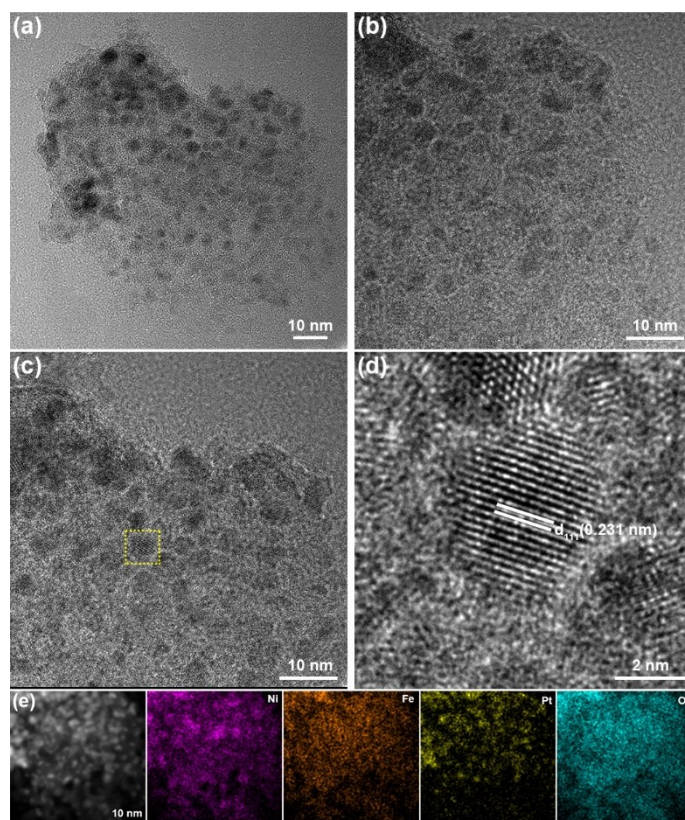

**Fig. S19** (a-c) TEM, (d) HRTEM and (e) the corresponding EDS element mapping images of  $\text{Pt}_3\text{Ni}_1/\text{NiFe}$  LDHs after ORR durability test for 2000 CV cycles.

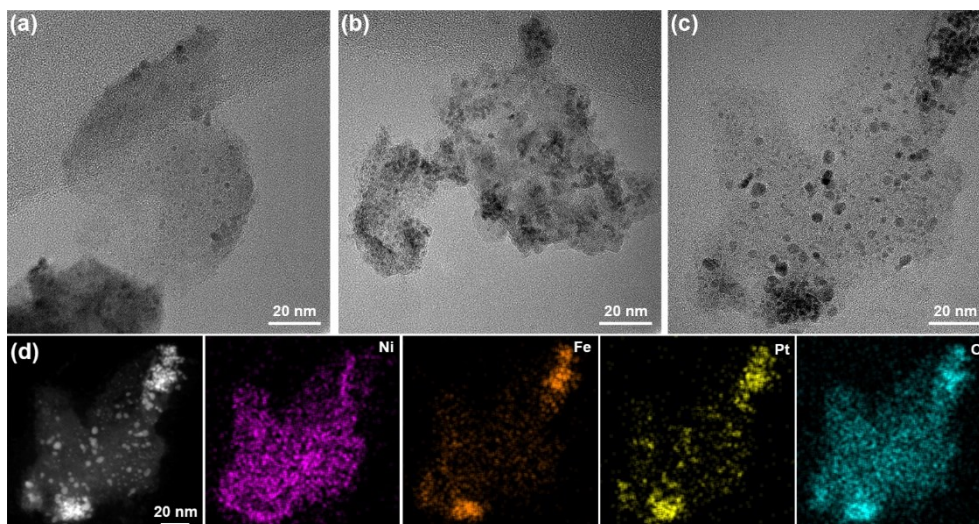

**Fig. S20** (a-c) TEM and (d) the corresponding EDS element mapping images of Pt/NiFe LDHs.

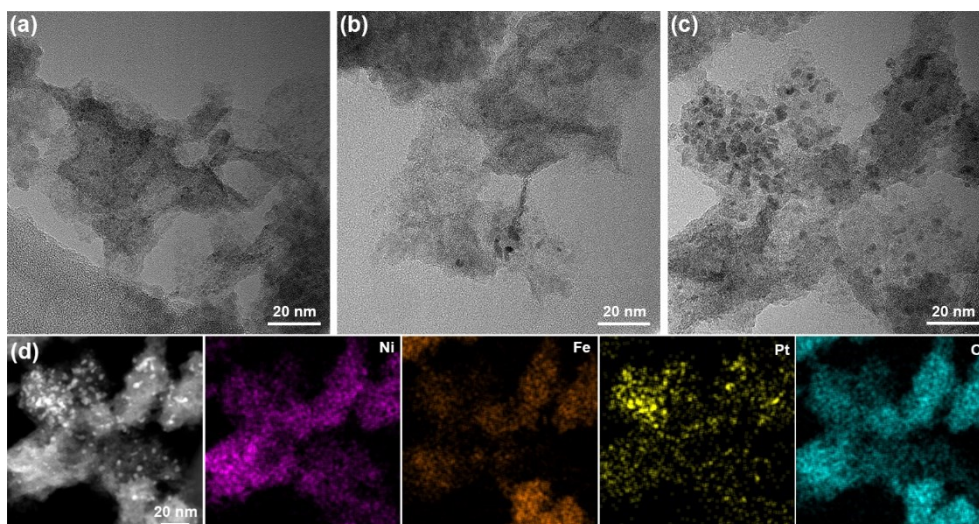

**Fig. S21** (a-c) TEM and (d) the corresponding EDS element mapping images of Pt<sub>3</sub>Ni<sub>1</sub>/NiFe LDHs.

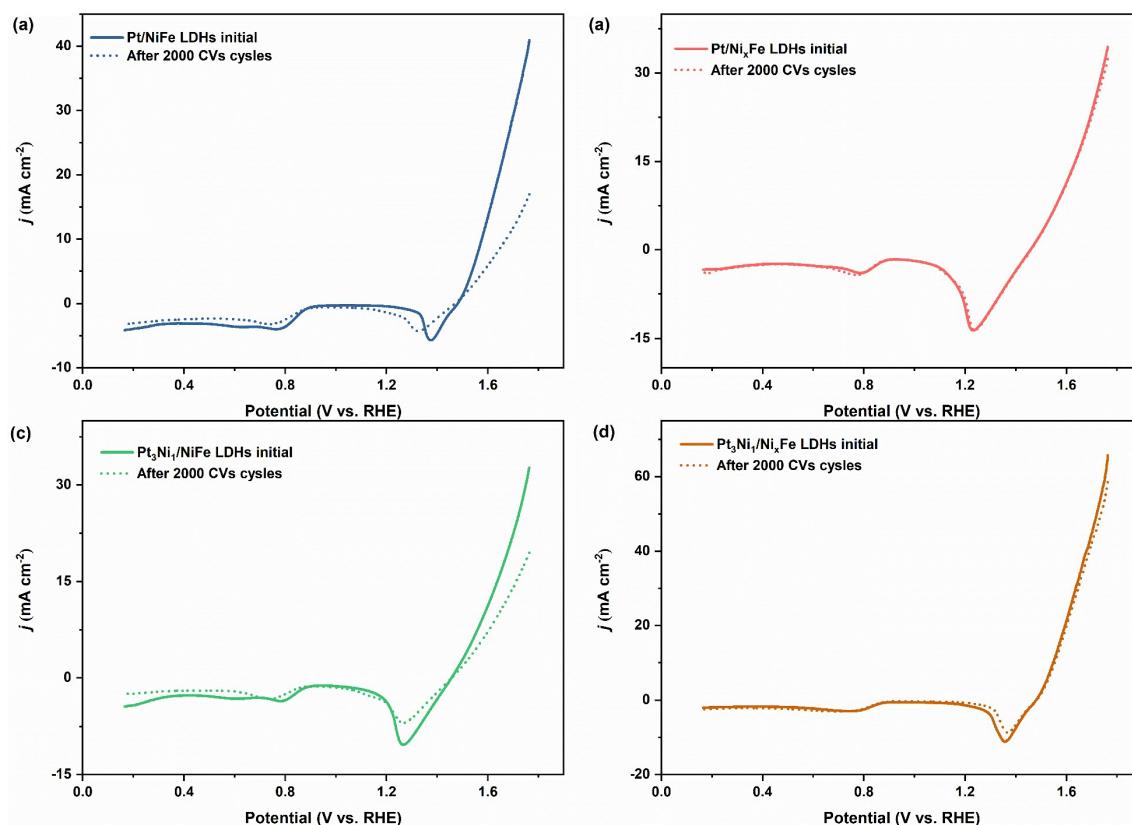

**Fig. S22** Polarization curves before and after 2000 CV cycles of (a, b) Pt and (c, d)  $\text{Pt}_3\text{Ni}_1$  nanoparticles deposited on perfect NiFe LDHs and defects-rich  $\text{Ni}_x\text{Fe}$  LDHs.

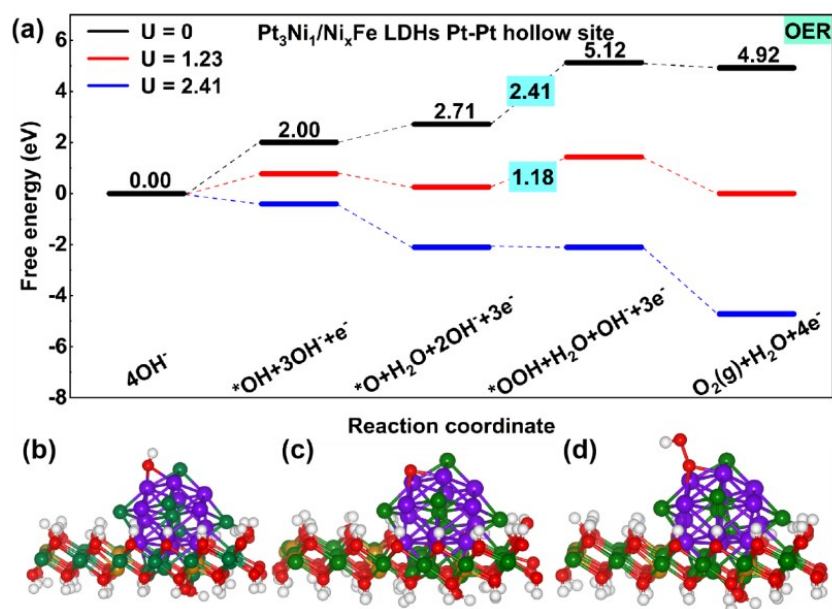

**Fig. S23** (a) The free energy profile for the OER pathway of  $\text{Pt}_3\text{Ni}_1/\text{Ni}_x\text{Fe}$  LDHs nanosheets. (b) Optimized structures after adsorption of  $^*\text{OH}$ ,  $^*\text{O}$  and  $^*\text{OOH}$  intermediates on Pt-Pt hollow site of  $\text{Pt}_3\text{Ni}_1/\text{Ni}_x\text{Fe}$  LDHs nanosheets. The white, red, brown, green and purple balls represent H, O, Fe, Ni and Pt atoms, respectively.

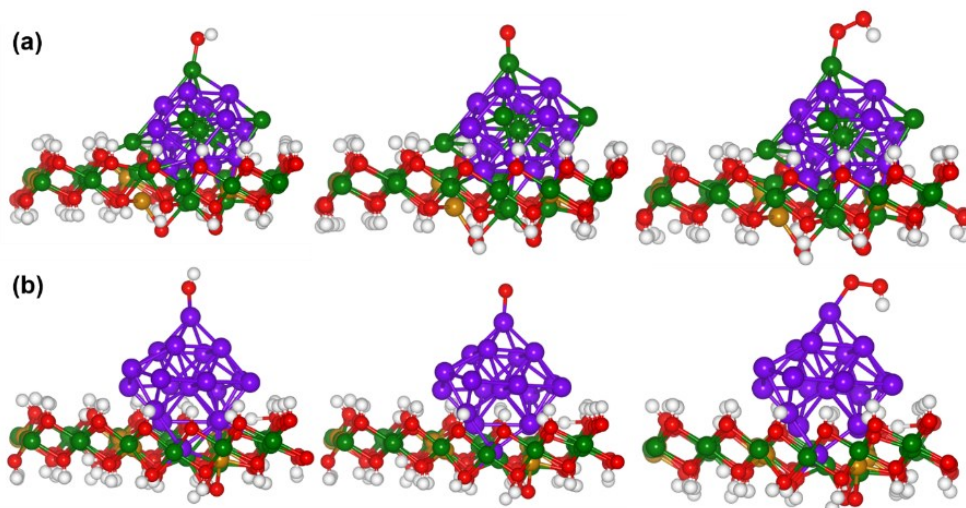

**Fig. S24** Optimized structures after adsorption of \*OH, \*O and \*OOH intermediates on (a) Ni top site of  $\text{Pt}_3\text{Ni}_1/\text{Ni}_x\text{Fe}$  LDHs nanosheets and (b) Pt top site of  $\text{Pt}/\text{Ni}_x\text{Fe}$  LDHs. The white, red, brown, green and purple balls represent H, O, Fe, Ni and Pt atoms, respectively.

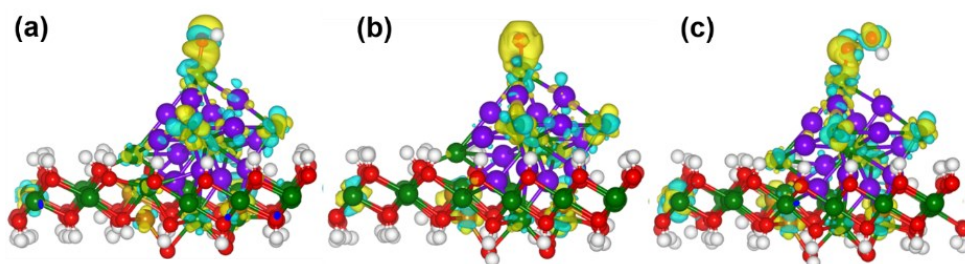

**Fig. S25** The charge density difference for \*OH (a), \*O (b), and \*OOH (c) intermediates adsorbed on Ni top site of  $\text{Pt}_3\text{Ni}_1/\text{Ni}_x\text{Fe}$  LDHs nanosheets. The white, red, brown, green and purple balls represent H, O, Fe, Ni and Pt atoms, respectively. The yellow (blue) corresponds to charge accumulation (depletion) plotted with an isovalue of  $\pm 0.03 \text{ e \AA}^{-3}$ .

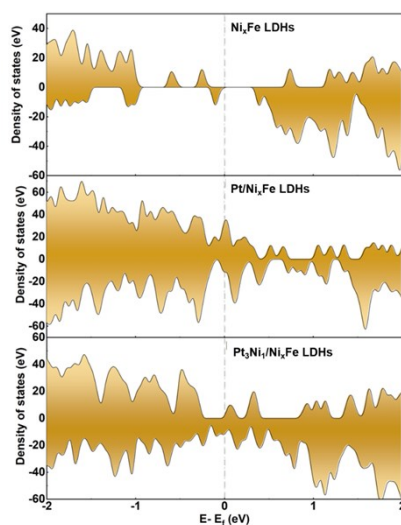

**Fig. S26** Calculated density of states (DOS) of defective  $\text{Ni}_x\text{Fe}$  LDHs,  $\text{Pt}/\text{Ni}_x\text{Fe}$  LDHs and  $\text{Pt}_3\text{Ni}_1/\text{Ni}_x\text{Fe}$  LDHs.

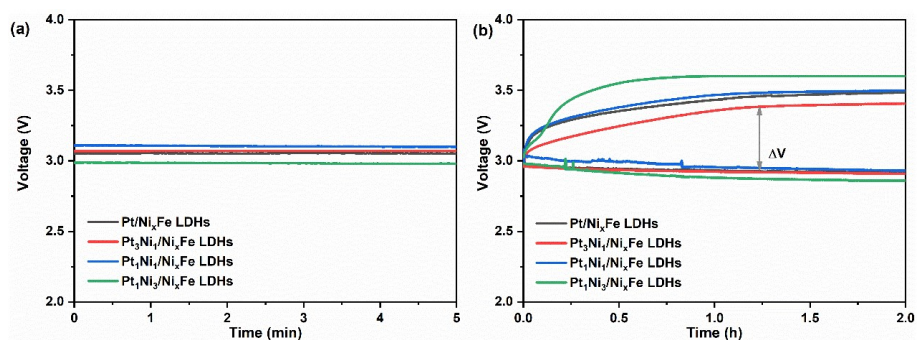

**Fig. S27** (a) Open-circuit voltages and (b) charge-discharge curves of HSABs using  $\text{Pt}_3\text{Ni}_1/\text{Ni}_x\text{Fe}$  LDHs,  $\text{Pt}_1\text{Ni}_1/\text{Ni}_x\text{Fe}$  LDHs,  $\text{Pt}_1\text{Ni}_3/\text{Ni}_x\text{Fe}$  LDHs,  $\text{Pt}/\text{Ni}_x\text{Fe}$  LDHs as air electrode, respectively.

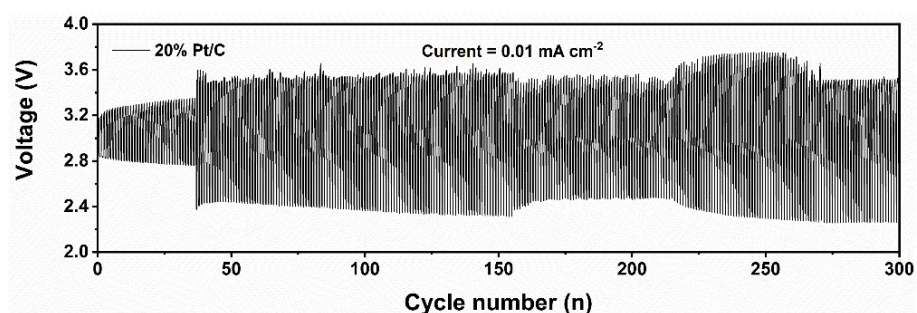

**Fig. S28** Cycling stability of hybrid sodium air batteries using 20% Pt/C at a current density of  $0.01 \text{ mA cm}^{-2}$  for 300 cycles.

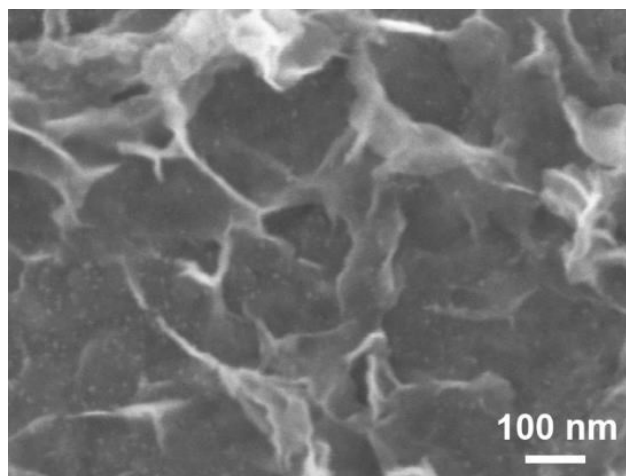

**Fig. S29** SEM image of  $\text{Pt}_3\text{Ni}_1/\text{Ni}_x\text{Fe}$  LDHs catalysts after long term cycling.

**Table S1** Comparison of the bifunctional catalytic activity of as-prepared samples with the recently reported electrocatalysts.

| Electrocatalysts                                         | ORR         |                     | OER         |                                     |                                          | Reference |                                           |
|----------------------------------------------------------|-------------|---------------------|-------------|-------------------------------------|------------------------------------------|-----------|-------------------------------------------|
|                                                          | Electrolyte | $E_{1/2}$ (V)       | Electrolyte | Tafel slope (mV dec <sup>-1</sup> ) | $\eta$ at $j=10$ mA cm <sup>-2</sup> (V) |           | $\eta$ at $j=100$ mA cm <sup>-2</sup> (V) |
| NiFe-LDH/Co,N-CNF                                        | 0.1 M KOH   | 0.79                | 0.1 M KOH   | 60                                  | 0.31                                     | -         | 1                                         |
| nNiFe LDH/3D MPC                                         | 0.1 M KOH   | 0.83                | 0.1 M KOH   | 71                                  | 0.340                                    | -         | 2                                         |
| Co <sub>3</sub> O <sub>4</sub> @NiFe LDH arrays/Ni foam  | -           | -                   | 1 M KOH     | 55.5                                | -                                        | 0.262     | 3                                         |
| Single-atom Au/NiFe LDH@Ti mesh                          | -           | -                   | 1 M KOH     | 36                                  | 0.237                                    | -         | 4                                         |
| Cu@NiFe LDH                                              | -           | -                   | 1 M KOH     | 28                                  | 0.199                                    | 0.281     | 5                                         |
| Ag NP/NiRu-LDHs                                          | 0.1 M KOH   | 0.78 ( $E_{j=-3}$ ) | 0.1 M KOH   | 33                                  | 0.31                                     | -         | 6                                         |
| Co <sub>3</sub> O <sub>4</sub> -doped Co/CoFe            | 0.1 M KOH   | -                   | 0.1 M KOH   | 72.8                                | 0.368                                    | -         | 7                                         |
| Fe-N-C + NiFe-LDH (3:1)                                  | 0.1 M KOH   | 0.79                | 0.1 M KOH   | -                                   | 0.31                                     | -         | 8                                         |
| CoAl-LDH@ZIF-67                                          | 0.1 M KOH   | 0.83                | -           | -                                   | -                                        | -         | 9                                         |
| Co SA@NCF/CNF film                                       | 0.1 M KOH   | 0.88                | 1 M KOH     | 47                                  | 0.4                                      | -         | 10                                        |
| O-NiCoFe-LDH                                             | 0.1 M KOH   | 0.63                | 0.1 M KOH   | 93                                  | 0.34                                     | -         | 11                                        |
| 20% Pt/C                                                 | 0.1 M KOH   | 0.862               | -           | -                                   | -                                        | -         | This work                                 |
| 20% Ir/C                                                 | -           | -                   | 1 M KOH     | 112                                 | 0.343                                    | 0.547     | This work                                 |
| NiFe LDHs                                                | 0.1 M KOH   | -                   | 1 M KOH     | 25.2                                | 0.269                                    | 0.479     | This work                                 |
| Ni <sub>x</sub> Fe LDHs                                  | 0.1 M KOH   | -                   | 1 M KOH     | 21                                  | 0.268                                    | 0.456     | This work                                 |
| Pt/Ni <sub>x</sub> Fe LDHs                               | 0.1 M KOH   | 0.851               | 1 M KOH     | 40.2                                | 0.263                                    | 0.442     | This work                                 |
| Pt <sub>3</sub> Ni <sub>1</sub> /Ni <sub>x</sub> Fe LDHs | 0.1 M KOH   | 0.852               | 1 M KOH     | 22                                  | 0.265                                    | 0.409     | This work                                 |
| Pt <sub>1</sub> Ni <sub>1</sub> /Ni <sub>x</sub> Fe LDHs | 0.1 M KOH   | 0.84                | 1 M KOH     | 27                                  | 0.267                                    | 0.425     | This work                                 |
| Pt <sub>1</sub> Ni <sub>3</sub> /Ni <sub>x</sub> Fe LDHs | 0.1 M KOH   | 0.827               | 1 M KOH     | 29.1                                | 0.270                                    | 0.44      | This work                                 |



**Table S2** Calculated adsorption energy ( $\Delta E_{\text{ads}}$ ) for \*OH, \*O and \*OOH intermediates adsorbed on Pt top site of Pt/Ni<sub>x</sub>Fe LDHs and Ni top site of Pt<sub>3</sub>Ni/Ni<sub>x</sub>Fe LDHs nanosheets.

|                                                          | $E_{*OH}$ (eV) | $E_{*O}$ (eV) | $E_{*OOH}$ (eV) |
|----------------------------------------------------------|----------------|---------------|-----------------|
| Pt/Ni <sub>x</sub> Fe LDHs                               | -0.43          | 1.05          | 2.92            |
| Pt <sub>3</sub> Ni <sub>1</sub> /Ni <sub>x</sub> Fe LDHs | 1.09           | 2.49          | 3.60            |

**Table S3** Comparison of the hybrid sodium-air batteries performances based on recently reported bifunctional catalysts.

| Cathode                                                  | Hybrid electrolyte<br>(organic aqueous)                                                          | Charge/Discharge<br>voltage (V) | Voltage<br>gap (V) | Roundtrip<br>efficiency (%) | Durability                          | Reference |
|----------------------------------------------------------|--------------------------------------------------------------------------------------------------|---------------------------------|--------------------|-----------------------------|-------------------------------------|-----------|
| MOF-NCNTs                                                | 1 M NaClO <sub>4</sub> in EC/DMC (1:1) with 1<br>vol% FEC 1 M NaOH                               | 3.10/2.80                       | 0.30               | 90                          | 35 cycles@0.01 mA cm <sup>-2</sup>  | 12        |
| VGC                                                      | 1 M NaCF <sub>3</sub> SO <sub>3</sub> in TEGDME<br> 0.1 M NaOH                                   | 3.45/2.81                       | 0.64               | 81                          | 50 cycles@4 mA g <sup>-1</sup>      | 13        |
| Co <sub>3</sub> (PO <sub>4</sub> ) <sub>2</sub>          | 1 M NaCF <sub>3</sub> SO <sub>3</sub> in TEGDME<br> 0.1 M NaOH                                   | 3.41/2.82                       | 0.59               | 83                          | 50 cycles@0.05 mA cm <sup>-2</sup>  | 14        |
| MnO <sub>2</sub> /rGO/carbon<br>paper                    | 1 M NaCF <sub>3</sub> SO <sub>3</sub> in TEGDME<br> 0.1 M NaOH                                   | 3.59/2.9                        | 0.7                | 81                          | 20 cycles@15 mA g <sup>-1</sup>     | 15        |
| S-rGO-CNT-Co                                             | 1 M NaCF <sub>3</sub> SO <sub>3</sub> in<br>TEGDME Seawater                                      | 3.42/3.00                       | 0.42               | 87.8                        | 50 cycles@0.01 mA cm <sup>-2</sup>  | 16        |
| P-Tl <sub>2</sub> Ru <sub>2</sub> O <sub>7</sub>         | 1 M NaCF <sub>3</sub> SO <sub>3</sub> in TEGDME<br> 0.1 M NaOH                                   | 3.23/3.07                       | 0.16               | 95                          | 50 cycles@0.01 mA cm <sup>-2</sup>  | 17        |
| CuS-CNT                                                  | 1 M NaClO <sub>4</sub> in EC/PC with 5%<br>FEC 0.25 M Na <sub>2</sub> S <sub>4</sub> /0.1 M NaOH | -                               | -                  | 90%                         | 100 cycles@0.5 mA cm <sup>-2</sup>  | 18        |
| Ni nanoparticles                                         | 1 M NaClO <sub>4</sub> in EC/DMC (1:1) with 1<br>vol% FEC 1 M NaOH                               | 3.22/2.65                       | 0.57               | 80.3                        | 100 cycles@0.1 mA cm <sup>-2</sup>  | 19        |
| CMO                                                      | 1 M NaCF <sub>3</sub> SO <sub>3</sub> in TEGDME<br> Sea water                                    | 3.71/3.13                       | 0.58               | 84.4                        | 30 cycles@0.01 mA cm <sup>-2</sup>  | 20        |
| dp-MnCo <sub>2</sub> O <sub>4</sub> /N-rGO               | 1 M NaClO <sub>4</sub> in EC/DMC (1:1) with 1<br>vol% FEC 1 M NaOH                               | 3.14/2.75                       | 0.39               | 87.6                        | 25 cycles@0.13 mA cm <sup>-2</sup>  | 21        |
| SnS <sub>2</sub>                                         | 1 M NaCF <sub>3</sub> SO <sub>3</sub> in TEGDME<br> 0.1 M NaOH                                   | 3.18/2.66                       | 0.52               | 83%                         | 40 cycles@5 mA g <sup>-1</sup>      | 22        |
| Pt/Ni <sub>x</sub> Fe LDHs                               | 1 M NaClO <sub>4</sub> in TEGDME<br> 0.1 M NaOH                                                  | 3.48/2.92                       | 0.56               | 83.9%                       | -                                   | This work |
| Pt <sub>1</sub> Ni <sub>1</sub> /Ni <sub>x</sub> Fe LDHs | 1 M NaClO <sub>4</sub> in TEGDME<br> 0.1 M NaOH                                                  | 3.50/2.93                       | 0.57               | 83.7%                       | -                                   | This work |
| Pt <sub>1</sub> Ni <sub>3</sub> /Ni <sub>x</sub> Fe LDHs | 1 M NaClO <sub>4</sub> in TEGDME<br> 0.1 M NaOH                                                  | 3.60/2.86                       | 0.74               | 79.4%                       | -                                   | This work |
| Pt <sub>3</sub> Ni <sub>1</sub> /Ni <sub>x</sub> Fe LDHs | 1 M NaClO <sub>4</sub> in TEGDME<br> 0.1 M NaOH                                                  | 3.41/2.91                       | 0.50               | 85.4                        | 350 cycles@0.01 mA cm <sup>-2</sup> | This work |

## References

1. Q. Wang, L. Shang, R. Shi, X. Zhang, Y. Zhao, G. Waterhouse, L. Wu, C. Tung, T. Zhang, *Adv. Energy Mater.*, 2017, **7**, 1700467.
2. W. Wang, Y. Liu, J. Li, J. Luo, L. Fu, S. Chen, *J. Mater. Chem. A*, 2018, **6**, 14299-14306.
3. X. Guo, X. Hu, D. Wu, C. Jing, W. Liu, Z. Ren, Q. Zhao, X. Jiang, C. Xu, Y. Zhang, N. Hu, *ACS Appl. Mater. Interfaces*, 2019, **11**, 21506-21514.
4. J. Zhang, J. Liu, L. Xi, Y. Yu, N. Chen, S. Sun, W. Wang, K. M. Lange, B. Zhang, *J. Am. Chem. Soc.*, 2018, **140**, 3876-3879.
5. L. Yu, H. Zhou, J. Sun, F. Qin, F. Yu, J. Bao, Y. Yu, S. Chen, Z. Ren, *Energy Environ. Sci.*, 2017, **10**, 1820-1827.
6. S. Chala, M. Tsai, W. Su, K. B. Ibrahim, A. Duma, M. Yeh, C. Wen, C. Yu, T. Chan, H. Dai, B. Hwang, *ACS Catal.*, 2019, **9**, 117-129.
7. T. Li, Y. Lu, S. Zhao, Z. D. Gao, Y. Song, *J. Mater. Chem. A*, 2018, **6**, 3730-3737.
8. S. Dresch, F. Luo, R. Schmack, S. Kühn, M. Gliech, P. Strasser, *Energy Environ. Sci.*, 2016, **9**, 2020-2024.
9. Z. Li, M. Shao, L. Zhou, R. Zhang, C. Zhang, M. Wei, D. G. Evans, X. Duan, *Adv. Mater.*, 2016, **28**, 2337-2344.
10. D. Ji, L. Fan, L. Li, S. Peng, D. Yu, J. Song, S. Ramakrishna, S. Guo, *Adv. Mater.*, 2019, **31**, 1808267.
11. L. Qian, Z. Lu, T. Xu, X. Wu, Y. Tian, Y. Li, Z. Huo, X. Sun, X. Duan, *Adv. Energy Mater.*, 2015, **5**, 1500245.
12. Y. Wu, X. Qiu, F. Liang, Q. Zhang, A. Koo, Y. Dai, Y. Lei, X. Sun, *Appl. Catal. B Environ.*, 2019, **241**, 407-414.
13. Z. Khan, B. Senthilkumar, S. Park, S. Park, J. Yang, J. Lee, H. Song, Y. Kim, S. Kwak, H. Ko, *J. Mater. Chem. A*, 2017, **5**, 2037-2044.
14. B. Senthilkumar, Z. Khan, S. Park, I. Seo, H. Ko, Y. J. Kim, *J. Power Sources.*, 2016, **311**, 29-34.
15. Z. Khan, S. Park, S. M. Hwang, J. Yang, H. Ko, *NPG Asia Mater.*, 2016, **8**, e294.
16. D. Suh, S. Park, P. Nakhavivej, Y. Kim, S. Hwang, H. Park, *J. Power Sources.*, 2017, **372**, 31-37.
17. M. Kim, H. Ju, J. Kim, *Appl. Catal. B Environ.*, 2019, **245**, 29-39.
18. M. Gross, A. Manthiram, *Energy Storage Mater.*, 2019, **19**, 346-351.
19. F. Su, X. Qiu, F. Liang, M. Tanaka, T. Qu, Y. Yao, W. Ma, B. Yang, Y. Dai, K. Hayashi, T. Watanabe, *Nanomaterials*, 2018, **8**, 684.
20. M. Abirami, S. Hwang, J. Yang, S. Senthilkumar, J. Kim, W. Go, B. Senthilkumar, H. Song, Y. Kim, *ACS Appl. Mater. Interfaces*, 2016, **8**, 32778-32787.
21. Y. Kang, D. Zou, J. Zhang, F. Liang, K. Hayashi, H. Wang, D. Xue, K. Chen, K. R. Adair, X. Sun, *Electrochim. Acta*, 2017, **244**, 222-229.
22. Z. Khan, N. Parveen, S. Ansari, S. Senthilkumar, H. Ko, *Electrochim. Acta*, 2017, **257**, 328-334.
